# Supplementary material
Source: PubMed Central journal article supplement (PMC9269985)
Supplement: NIHMS1754759-supplement-1754759_Sup_material.pdf [file NIHMS1754759-supplement-1754759_Sup_material.pdf]

## Supplemental Material

### **Prenatal exposure to ambient air pollution and traffic and indicators of adiposity in early childhood: The Healthy Start study**

Lizan D. Bloemsma, Dana Dabelea, Deborah S.K. Thomas, Jennifer L. Peel, John L. Adgate, William B. Allshouse, Sheena E. Martenies, Sheryl Magzamen, Anne P. Starling

#### **Table of contents**

|                                                                                                                                                                                                                                                                   |    |
|-------------------------------------------------------------------------------------------------------------------------------------------------------------------------------------------------------------------------------------------------------------------|----|
| <b>Table S1.</b> Comparison between mother-child pairs included in this study and the full potentially eligible Healthy Start study population.                                                                                                                   | 2  |
| <b>Table S2.</b> Indicators of adiposity at age 4-6 years and exposure to ambient PM <sub>2.5</sub> and O <sub>3</sub> and traffic at the residential address during pregnancy by maternal level of education and quartiles of median income in the Census tract. | 3  |
| <b>Table S3.</b> Unadjusted associations of exposure to PM <sub>2.5</sub> and O <sub>3</sub> at the residential address during pregnancy with indicators of adiposity at age 4-6 years.                                                                           | 4  |
| <b>Table S4.</b> Associations of exposure to PM <sub>2.5</sub> and O <sub>3</sub> at the residential address during pregnancy with indicators of adiposity at age 4-6 years - model 2.                                                                            | 5  |
| <b>Table S5.</b> Unadjusted associations of exposure to traffic at the residential address during pregnancy with indicators of adiposity at age 4-6 years.                                                                                                        | 6  |
| <b>Table S6.</b> Associations of exposure to PM <sub>2.5</sub> and O <sub>3</sub> at the residential address during pregnancy with obesity (yes, no) and BMI z-scores (continuous) at age 4-6 years.                                                              | 8  |
| <b>Table S7.</b> Associations of exposure to traffic at the residential address during pregnancy with obesity (yes, no) and BMI z-scores (continuous) at age 4-6 years.                                                                                           | 9  |
| <b>Table S8.</b> Associations of exposure to PM <sub>2.5</sub> and O <sub>3</sub> at the residential address during pregnancy with indicators of adiposity at age 4-6 years in children whose mothers did not smoke during pregnancy (n = 692).                   | 10 |
| <b>Table S9.</b> Associations of exposure to traffic at the residential address during pregnancy with indicators of adiposity at age 4-6 years in children whose mothers did not smoke during pregnancy (n = 692).                                                | 11 |
| <b>Figure S1.</b> Flow diagram of study participants.                                                                                                                                                                                                             | 13 |
| <b>Figure S2.</b> Directed acyclic graph for the associations of exposure to ambient air pollution and traffic at the residential address during pregnancy with indicators of adiposity at age 4-6 years.                                                         | 14 |
| <b>Figure S3.</b> Spearman correlations between prenatal exposure to traffic and ambient air pollution among 738 participants of the Healthy Start study.                                                                                                         | 15 |

Table S1. Comparison between mother-child pairs included in this study and the full potentially eligible Healthy Start study population.

| Characteristic                                         | Participants included in this study (n = 738)                     | Potentially eligible Healthy Start study population (n = 1382)    |
|--------------------------------------------------------|-------------------------------------------------------------------|-------------------------------------------------------------------|
|                                                        | n (%) or median (25 <sup>th</sup> - 75 <sup>th</sup> percentiles) | n (%) or median (25 <sup>th</sup> - 75 <sup>th</sup> percentiles) |
| Child's sex (boys)                                     | 389 (52.7)                                                        | 695 (51.8)                                                        |
| Maternal age at delivery (years)                       | 29.0 (23.0 - 33.0)                                                | 28.0 (22.0 - 32.0)                                                |
| Pre-pregnancy BMI (kg/m <sup>2</sup> )                 |                                                                   |                                                                   |
| Normal weight/underweight (<25.0)                      | 382 (51.8)                                                        | 759 (55.0)                                                        |
| Overweight (25.0 - 30.0)                               | 203 (27.5)                                                        | 346 (25.1)                                                        |
| Obesity (≥30.0)                                        | 153 (20.7)                                                        | 275 (19.9)                                                        |
| Parity                                                 |                                                                   |                                                                   |
| Primiparous                                            | 353 (47.8)                                                        | 662 (47.9)                                                        |
| Multiparous                                            | 385 (52.2)                                                        | 720 (52.1)                                                        |
| Race/ethnicity                                         |                                                                   |                                                                   |
| Non-Hispanic white                                     | 406 (55.0)                                                        | 738 (53.4)                                                        |
| Hispanic                                               | 179 (24.3)                                                        | 347 (25.1)                                                        |
| Non-Hispanic black                                     | 114 (15.5)                                                        | 210 (15.2)                                                        |
| Other                                                  | 39 (5.3)                                                          | 87 (6.3)                                                          |
| Maternal level of education                            |                                                                   |                                                                   |
| Less than 12 <sup>th</sup> grade or high school degree | 219 (29.7)                                                        | 453 (32.8)                                                        |
| Some college                                           | 166 (22.5)                                                        | 325 (23.5)                                                        |
| Four years of college                                  | 168 (22.8)                                                        | 304 (22.0)                                                        |
| Graduate degree                                        | 185 (25.1)                                                        | 300 (21.7)                                                        |
| Maternal smoking during pregnancy (yes)                | 46 (6.2)                                                          | 120 (8.7)                                                         |
| Median income in the Census tract (\$)                 | 56749.0 (43182.0 - 83085.0)                                       | 55809.0 (43585.0 - 82736.0)                                       |

Abbreviations: BMI = body mass index.

Table S2. Indicators of adiposity at age 4-6 years and exposure to ambient PM<sub>2.5</sub> and O<sub>3</sub> and traffic at the residential address during pregnancy by maternal level of education and quartiles of median income in the Census tract.

| Characteristic<br>n (%) or median (25 <sup>th</sup> - 75 <sup>th</sup> percentiles) | Maternal level of education                               |                                   |                                   |                          |
|-------------------------------------------------------------------------------------|-----------------------------------------------------------|-----------------------------------|-----------------------------------|--------------------------|
|                                                                                     | Less than 12 <sup>th</sup> grade or<br>high school degree | Some college                      | Four years of college             | Graduate degree          |
| Overweight                                                                          | 43 (19.7)                                                 | 24 (14.5)                         | 20 (12.1)                         | 17 (9.3)                 |
| Waist circumference (cm)                                                            | 51.0 (49.0 - 53.9)                                        | 51.0 (49.0 - 53.6)                | 50.9 (48.6 - 53.4)                | 50.7 (49.0 - 53.5)       |
| Percent fat mass                                                                    | 19.8 (15.6 - 24.2)                                        | 19.5 (14.7 - 24.1)                | 19.2 (15.3 - 23.1)                | 20.0 (15.4 - 24.3)       |
| FMI (kg/m <sup>2</sup> )                                                            | 3.0 (2.3 - 3.9)                                           | 2.9 (2.2 - 3.7)                   | 2.8 (2.3 - 3.6)                   | 3.0 (2.3 - 3.7)          |
| Full pregnancy average PM <sub>2.5</sub> (µg/m <sup>3</sup> )                       | 7.5 (7.1 - 7.9)                                           | 7.5 (7.0 - 7.9)                   | 7.4 (6.9 - 7.8)                   | 7.5 (7.1 - 7.8)          |
| Full pregnancy average 8-hr max O <sub>3</sub> (ppb)                                | 44.1 (41.3 - 47.1)                                        | 44.3 (41.7 - 47.4)                | 44.4 (41.8 - 47.2)                | 42.6 (39.2 - 45.5)       |
| Distance to nearest highway (m)                                                     | 681.1 (307.0 - 1551.6)                                    | 775.0 (410.0 - 1792.7)            | 844.8 (426.7 - 1688.4)            | 1086.4 (542.7 - 1704.8)  |
| Distance to nearest non-highway major roadway (m)                                   | 139.7 (60.8 - 295.4)                                      | 193.1 (79.4 - 318.7)              | 133.2 (67.1 - 313.6)              | 149.2 (70.7 - 319.7)     |
|                                                                                     | Median income in the Census tract (\$)                    |                                   |                                   |                          |
|                                                                                     | Quartile 1<br>(<43182.0)                                  | Quartile 2<br>(43182.0 - 56749.0) | Quartile 3<br>(56749.0 - 83085.0) | Quartile 4<br>(≥83085.0) |
| Overweight                                                                          | 34 (18.7)                                                 | 29 (15.7)                         | 23 (12.6)                         | 18 (9.8)                 |
| Waist circumference (cm)                                                            | 51.2 (48.6 - 54.0)                                        | 50.6 (48.7 - 53.5)                | 51.0 (49.3 - 53.3)                | 50.9 (48.8 - 53.5)       |
| Percent fat mass                                                                    | 20.0 (15.3 - 24.6)                                        | 19.6 (15.0 - 23.5)                | 18.8 (14.6 - 22.9)                | 20.5 (16.4 - 24.2)       |
| FMI (kg/m <sup>2</sup> )                                                            | 3.0 (2.3 - 3.9)                                           | 3.0 (2.2 - 3.6)                   | 2.9 (2.1 - 3.6)                   | 3.1 (2.4 - 3.7)          |
| Full pregnancy average PM <sub>2.5</sub> (µg/m <sup>3</sup> )                       | 7.5 (7.1 - 7.9)                                           | 7.6 (7.0 - 7.9)                   | 7.5 (7.1 - 8.0)                   | 7.3 (6.9 - 7.7)          |
| Full pregnancy average 8-hr max O <sub>3</sub> (ppb)                                | 43.3 (40.9 - 46.2)                                        | 43.6 (40.7 - 47.1)                | 43.8 (40.7 - 46.9)                | 44.5 (42.1 - 46.8)       |
| Distance to nearest highway (m)                                                     | 444.9 (265.3 - 818.0)                                     | 874.7 (470.6 - 1661.3)            | 1185.4 (483.7 - 2013.2)           | 1363.3 (629.5 - 2053.3)  |
| Distance to nearest non-highway major roadway (m)                                   | 126.5 (38.2 - 255.5)                                      | 126.9 (54.5 - 233.2)              | 166.8 (73.4 - 328.2)              | 244.4 (84.5 - 503.6)     |

Abbreviations: FMI = fat mass index; PM<sub>2.5</sub> = fine particulate matter; O<sub>3</sub> = ozone.

Table S3. Unadjusted associations of exposure to PM<sub>2.5</sub> and O<sub>3</sub> at the residential address during pregnancy with indicators of adiposity at age 4-6 years.

| Exposure (increment)                                              | Overweight               | Waist circumference         | Percent fat mass            | FMI                         |
|-------------------------------------------------------------------|--------------------------|-----------------------------|-----------------------------|-----------------------------|
|                                                                   | OR (95% CI)              | β (95% CI)                  | β (95% CI)                  | β (95% CI)                  |
| Trimester 1 average PM <sub>2.5</sub> (1.3 μg/m <sup>3</sup> )    | 1.06 (0.82, 1.38)        | <b>0.44 (0.04, 0.85)</b>    | -0.11 (-0.76, 0.54)         | 0.00 (-0.12, 0.12)          |
| Trimester 2 average PM <sub>2.5</sub> (1.3 μg/m <sup>3</sup> )    | 1.00 (0.76, 1.31)        | <b>0.42 (0.01, 0.83)</b>    | 0.46 (-0.20, 1.12)          | 0.09 (-0.03, 0.22)          |
| Trimester 3 average PM <sub>2.5</sub> (1.3 μg/m <sup>3</sup> )    | 0.98 (0.75, 1.30)        | -0.31 (-0.73, 0.11)         | <b>-1.30 (-1.97, -0.63)</b> | <b>-0.21 (-0.34, -0.08)</b> |
| Full pregnancy average PM <sub>2.5</sub> (0.9 μg/m <sup>3</sup> ) | 1.07 (0.79, 1.45)        | 0.40 (-0.05, 0.86)          | -0.53 (-1.28, 0.22)         | -0.06 (-0.20, 0.08)         |
| Trimester 1 average 8-hr max O <sub>3</sub> (20.4 ppb)            | <b>0.65 (0.44, 0.97)</b> | <b>-0.85 (-1.43, -0.27)</b> | <b>-1.69 (-2.64, -0.74)</b> | <b>-0.33 (-0.51, -0.16)</b> |
| Trimester 2 average 8-hr max O <sub>3</sub> (18.0 ppb)            | 1.32 (0.91, 1.92)        | -0.02 (-0.58, 0.54)         | -0.13 (-1.07, 0.80)         | 0.00 (-0.17, 0.17)          |
| Trimester 3 average 8-hr max O <sub>3</sub> (18.7 ppb)            | <b>1.62 (1.09, 2.42)</b> | 0.33 (-0.25, 0.90)          | <b>1.59 (0.65, 2.53)</b>    | <b>0.30 (0.12, 0.47)</b>    |
| Full pregnancy average 8-hr max O <sub>3</sub> (5.8 ppb)          | 1.23 (0.91, 1.67)        | -0.38 (-0.83, 0.06)         | -0.17 (-0.91, 0.57)         | -0.03 (-0.17, 0.11)         |

Abbreviations: PM<sub>2.5</sub> = fine particulate matter; O<sub>3</sub> = ozone; FMI = fat mass index.

Associations are shown for an interquartile range increase in exposure. Statistically significant results are highlighted in bold (p <0.05).

Table S4. Associations of exposure to PM<sub>2.5</sub> and O<sub>3</sub> at the residential address during pregnancy with indicators of adiposity at age 4-6 years - model 2.

| Exposure (increment)                                              | Overweight        | Waist circumference | Percent fat mass            | FMI                         |
|-------------------------------------------------------------------|-------------------|---------------------|-----------------------------|-----------------------------|
|                                                                   | OR (95% CI)       | β (95% CI)          | β (95% CI)                  | β (95% CI)                  |
| Trimester 1 average PM <sub>2.5</sub> (1.3 μg/m <sup>3</sup> )    | 0.95 (0.71, 1.29) | -0.07 (-0.46, 0.33) | -0.13 (-0.79, 0.52)         | -0.04 (-0.16, 0.08)         |
| Trimester 2 average PM <sub>2.5</sub> (1.3 μg/m <sup>3</sup> )    | 1.05 (0.77, 1.41) | 0.33 (-0.07, 0.72)  | <b>0.70 (0.05, 1.34)</b>    | <b>0.13 (0.01, 0.25)</b>    |
| Trimester 3 average PM <sub>2.5</sub> (1.3 μg/m <sup>3</sup> )    | 1.03 (0.74, 1.44) | -0.23 (-0.64, 0.17) | <b>-1.21 (-1.88, -0.54)</b> | <b>-0.19 (-0.31, -0.06)</b> |
| Full pregnancy average PM <sub>2.5</sub> (0.9 μg/m <sup>3</sup> ) | 1.05 (0.74, 1.48) | 0.03 (-0.40, 0.46)  | -0.25 (-0.98, 0.48)         | -0.04 (-0.17, 0.10)         |
| Trimester 1 average 8-hr max O <sub>3</sub> (20.4 ppb)            | 1.02 (0.45, 2.34) | 0.00 (-1.03, 1.04)  | <b>-2.87 (-4.60, -1.13)</b> | <b>-0.41 (-0.73, -0.08)</b> |
| Trimester 2 average 8-hr max O <sub>3</sub> (18.0 ppb)            | 1.25 (0.59, 2.63) | -0.23 (-1.17, 0.71) | -0.27 (-1.83, 1.29)         | -0.02 (-0.31, 0.27)         |
| Trimester 3 average 8-hr max O <sub>3</sub> (18.7 ppb)            | 1.30 (0.60, 2.86) | -0.89 (-1.91, 0.13) | <b>1.99 (0.27, 3.71)</b>    | 0.26 (-0.06, 0.58)          |
| Full pregnancy average 8-hr max O <sub>3</sub> (5.8 ppb)          | 1.23 (0.75, 2.00) | -0.41 (-1.00, 0.19) | -0.55 (-1.55, 0.46)         | -0.08 (-0.27, 0.11)         |

Abbreviations: PM<sub>2.5</sub> = fine particulate matter; O<sub>3</sub> = ozone; FMI = fat mass index.

Statistically significant results are highlighted in bold (p <0.05).

Associations are shown for an interquartile range increase in exposure. Associations are adjusted for child's sex, child's age, maternal age at delivery, pre-pregnancy BMI, parity, race/ethnicity, maternal level of education, maternal smoking during pregnancy, season of birth and median income in the Census tract.

Table S5. Unadjusted associations of exposure to traffic at the residential address during pregnancy with indicators of adiposity at age 4-6 years.

| Exposure                                                      | Overweight               | Waist circumference      | Percent fat mass    | FMI                      |
|---------------------------------------------------------------|--------------------------|--------------------------|---------------------|--------------------------|
|                                                               | OR (95% CI)              | $\beta$ (95% CI)         | $\beta$ (95% CI)    | $\beta$ (95% CI)         |
| Distance to highway (m)                                       |                          |                          |                     |                          |
| Quartile 1 (<404.24)                                          | <b>2.78 (1.46, 5.28)</b> | <b>1.39 (0.50, 2.28)</b> | 0.74 (-0.71, 2.20)  | <b>0.32 (0.05, 0.59)</b> |
| Quartile 2 (404.24 - 866.43)                                  | 1.46 (0.73, 2.93)        | <b>0.94 (0.06, 1.83)</b> | 0.30 (-1.17, 1.76)  | 0.17 (-0.10, 0.45)       |
| Quartile 3 (866.43 - 1688.56)                                 | <b>2.37 (1.24, 4.55)</b> | 0.73 (-0.16, 1.61)       | 0.77 (-0.71, 2.25)  | 0.23 (-0.04, 0.51)       |
| Quartile 4 ( $\geq$ 1688.56)                                  | ref                      | ref                      | ref                 | ref                      |
| Distance to other major roadway (m)                           |                          |                          |                     |                          |
| Quartile 1 (<68.01)                                           | 1.19 (0.66, 2.14)        | 0.25 (-0.64, 1.14)       | 0.45 (-1.00, 1.90)  | 0.09 (-0.18, 0.37)       |
| Quartile 2 (68.01 - 152.89)                                   | 1.14 (0.63, 2.06)        | 0.26 (-0.63, 1.15)       | 0.80 (-0.65, 2.25)  | 0.13 (-0.14, 0.40)       |
| Quartile 3 (152.89 - 307.58)                                  | 1.03 (0.56, 1.88)        | -0.15 (-1.04, 0.74)      | 1.19 (-0.28, 2.65)  | 0.19 (-0.08, 0.46)       |
| Quartile 4 ( $\geq$ 307.58)                                   | ref                      | ref                      | ref                 | ref                      |
| Traffic density within 150m<br>(vehicles*km/day) <sup>a</sup> |                          |                          |                     |                          |
| Quartiles 1 and 2 combined (0.00 - 437.04)                    | ref                      | ref                      | ref                 | ref                      |
| Quartile 3 (437.04 - 2846.08)                                 | 1.09 (0.65, 1.83)        | 0.61 (-0.17, 1.39)       | 0.32 (-0.95, 1.59)  | 0.07 (-0.17, 0.31)       |
| Quartile 4 ( $\geq$ 2846.08)                                  | 1.27 (0.77, 2.09)        | 0.05 (-0.73, 0.83)       | 0.06 (-1.23, 1.35)  | 0.01 (-0.23, 0.25)       |
| Traffic density within 250m<br>(vehicles*km/day)              |                          |                          |                     |                          |
| Quartile 1 (0.00)                                             | ref                      | ref                      | ref                 | ref                      |
| Quartile 2 (0.00 - 3276.04)                                   | 1.07 (0.59, 1.94)        | 0.53 (-0.38, 1.44)       | 0.25 (-1.24, 1.74)  | 0.08 (-0.20, 0.36)       |
| Quartile 3 (3276.04 - 9493.52)                                | 0.84 (0.46, 1.54)        | 0.12 (-0.75, 1.00)       | -0.70 (-2.14, 0.74) | -0.14 (-0.41, 0.13)      |
| Quartile 4 ( $\geq$ 9493.52)                                  | 1.31 (0.75, 2.28)        | 0.20 (-0.68, 1.07)       | 0.31 (-1.12, 1.73)  | 0.08 (-0.18, 0.35)       |
| Traffic density within 500m<br>(vehicles*km/day)              |                          |                          |                     |                          |
| Quartile 1 (<9478.13)                                         | ref                      | ref                      | ref                 | ref                      |
| Quartile 2 (9478.13 - 23058.84)                               | 0.69 (0.37, 1.28)        | 0.31 (-0.59, 1.21)       | -0.29 (-1.77, 1.19) | -0.04 (-0.31, 0.24)      |
| Quartile 3 (23058.84 - 42550.53)                              | 0.80 (0.44, 1.44)        | -0.02 (-0.92, 0.88)      | 0.18 (-1.30, 1.65)  | 0.04 (-0.23, 0.32)       |
| Quartile 4 ( $\geq$ 42550.53)                                 | 1.18 (0.68, 2.06)        | 0.73 (-0.17, 1.63)       | -0.06 (-1.52, 1.41) | 0.07 (-0.20, 0.35)       |

|                                                   |                   |                    |                    |                    |
|---------------------------------------------------|-------------------|--------------------|--------------------|--------------------|
| Traffic density within 1000m<br>(vehicles*km/day) |                   |                    |                    |                    |
| Quartile 1 (<64368.33)                            | ref               | ref                | ref                | ref                |
| Quartile 2 (64368.33 - 111625.29)                 | 1.17 (0.63, 2.19) | 0.54 (-0.36, 1.44) | 0.79 (-0.69, 2.28) | 0.17 (-0.11, 0.45) |
| Quartile 3 (111625.29 - 160574.81)                | 1.70 (0.94, 3.07) | 0.76 (-0.14, 1.66) | 0.66 (-0.81, 2.13) | 0.20 (-0.08, 0.47) |
| Quartile 4 (≥160574.81)                           | 1.25 (0.67, 2.32) | 0.66 (-0.24, 1.56) | 0.29 (-1.20, 1.78) | 0.16 (-0.12, 0.44) |

Abbreviations: FMI = fat mass index. Statistically significant results are highlighted in bold ( $p < 0.05$ ).

<sup>a</sup> For traffic density in a buffer of 150m around the home address, quartiles 1 and 2 were combined due to the large number of zero values.

Table S6. Associations of exposure to PM<sub>2.5</sub> and O<sub>3</sub> at the residential address during pregnancy with obesity (yes, no) and BMI z-scores (continuous) at age 4-6 years. <sup>a</sup>

| Exposure (increment)                                              | Obesity           | BMI z-score              |
|-------------------------------------------------------------------|-------------------|--------------------------|
|                                                                   | OR (95% CI)       | β (95% CI)               |
| Trimester 1 average PM <sub>2.5</sub> (1.3 μg/m <sup>3</sup> )    | 0.66 (0.38, 1.13) | 0.00 (-0.11, 0.10)       |
| Trimester 2 average PM <sub>2.5</sub> (1.3 μg/m <sup>3</sup> )    | 1.37 (0.88, 2.15) | <b>0.11 (0.00, 0.21)</b> |
| Trimester 3 average PM <sub>2.5</sub> (1.3 μg/m <sup>3</sup> )    | 0.74 (0.41, 1.34) | -0.03 (-0.13, 0.08)      |
| Full pregnancy average PM <sub>2.5</sub> (0.9 μg/m <sup>3</sup> ) | 0.71 (0.41, 1.24) | 0.06 (-0.06, 0.18)       |
| Trimester 1 average 8-hr max O <sub>3</sub> (20.4 ppb)            | 1.49 (0.28, 8.01) | -0.03 (-0.32, 0.27)      |
| Trimester 2 average 8-hr max O <sub>3</sub> (18.0 ppb)            | 1.22 (0.36, 4.18) | -0.03 (-0.29, 0.22)      |
| Trimester 3 average 8-hr max O <sub>3</sub> (18.7 ppb)            | 0.60 (0.18, 2.03) | -0.11 (-0.38, 0.16)      |
| Full pregnancy average 8-hr max O <sub>3</sub> (5.8 ppb)          | 1.03 (0.48, 2.21) | -0.02 (-0.18, 0.15)      |

Abbreviations: PM<sub>2.5</sub> = fine particulate matter; O<sub>3</sub> = ozone; BMI = body mass index.

Associations are shown for an interquartile range increase in exposure.

Statistically significant results are highlighted in bold (p <0.05).

<sup>a</sup> Associations are adjusted for child's sex, child's age, maternal age at delivery, pre-pregnancy BMI, parity, race/ethnicity, maternal level of education, maternal smoking during pregnancy, season of birth and median income in the Census tract. Associations with PM<sub>2.5</sub> are additionally adjusted for the average 8-hour maximum O<sub>3</sub> concentration during the specified pregnancy period. Associations with O<sub>3</sub> are additionally adjusted for the average daily PM<sub>2.5</sub> concentration during the specified pregnancy period.



Table S7. Associations of exposure to traffic at the residential address during pregnancy with obesity (yes, no) and BMI z-scores (continuous) at age 4-6 years. <sup>a</sup>

| Exposure                                                   | Obesity                  | BMI z-score              |
|------------------------------------------------------------|--------------------------|--------------------------|
|                                                            | OR (95% CI)              | $\beta$ (95% CI)         |
| Distance to highway (m)                                    |                          |                          |
| Quartile 1 (<404.24)                                       | 2.45 (0.81, 7.40)        | <b>0.31 (0.09, 0.53)</b> |
| Quartile 2 (404.24 - 866.43)                               | 1.82 (0.58, 5.69)        | <b>0.39 (0.18, 0.61)</b> |
| Quartile 3 (866.43 - 1688.56)                              | 2.37 (0.80, 7.05)        | <b>0.40 (0.19, 0.61)</b> |
| Quartile 4 ( $\geq$ 1688.56)                               | ref                      | ref                      |
| Distance to other major roadway (m)                        |                          |                          |
| Quartile 1 (<68.01)                                        | 0.51 (0.20, 1.32)        | 0.04 (-0.18, 0.26)       |
| Quartile 2 (68.01 - 152.89)                                | 0.54 (0.21, 1.37)        | 0.06 (-0.16, 0.27)       |
| Quartile 3 (152.89 - 307.58)                               | 0.49 (0.19, 1.24)        | 0.04 (-0.17, 0.25)       |
| Quartile 4 ( $\geq$ 307.58)                                | ref                      | ref                      |
| Traffic density within 150m (vehicles*km/day) <sup>b</sup> |                          |                          |
| Quartiles 1 and 2 combined (0.00 - 437.04)                 | ref                      | ref                      |
| Quartile 3 (437.04 - 2846.08)                              | 0.96 (0.44, 2.11)        | 0.03 (-0.15, 0.22)       |
| Quartile 4 ( $\geq$ 2846.08)                               | 0.59 (0.24, 1.46)        | -0.02 (-0.21, 0.16)      |
| Traffic density within 250m (vehicles*km/day)              |                          |                          |
| Quartile 1 (0.00)                                          | ref                      | ref                      |
| Quartile 2 (0.00 - 3276.04)                                | 0.75 (0.31, 1.80)        | 0.15 (-0.06, 0.37)       |
| Quartile 3 (3276.04 - 9493.52)                             | <b>0.27 (0.10, 0.76)</b> | -0.07 (-0.28, 0.14)      |
| Quartile 4 ( $\geq$ 9493.52)                               | 0.60 (0.25, 1.46)        | 0.02 (-0.19, 0.23)       |
| Traffic density within 500m (vehicles*km/day)              |                          |                          |
| Quartile 1 (<9478.13)                                      | ref                      | ref                      |
| Quartile 2 (9478.13 - 23058.84)                            | 0.56 (0.22, 1.44)        | -0.02 (-0.24, 0.19)      |
| Quartile 3 (23058.84 - 42550.53)                           | <b>0.31 (0.11, 0.87)</b> | -0.15 (-0.37, 0.06)      |
| Quartile 4 ( $\geq$ 42550.53)                              | 0.76 (0.31, 1.90)        | 0.03 (-0.19, 0.24)       |
| Traffic density within 1000m (vehicles*km/day)             |                          |                          |
| Quartile 1 (<64368.33)                                     | ref                      | ref                      |
| Quartile 2 (64368.33 – 111625.29)                          | 0.87 (0.32, 2.42)        | 0.07 (-0.15, 0.29)       |
| Quartile 3 (111625.29 – 160574.81)                         | 1.08 (0.41, 2.87)        | 0.18 (-0.05, 0.40)       |
| Quartile 4 ( $\geq$ 160574.81)                             | 0.94 (0.34, 2.60)        | 0.20 (-0.03, 0.43)       |

Abbreviations: BMI = body mass index. Statistically significant results are highlighted in bold (p <0.05).

<sup>a</sup> Associations are adjusted for child's sex, child's age, maternal age at delivery, pre-pregnancy BMI, parity, race/ethnicity, maternal level of education, maternal smoking during pregnancy, season of birth and median income in the Census tract.

<sup>b</sup> For traffic density in a buffer of 150m around the home address, quartiles 1 and 2 were combined due to the large number of zero values.

Table S8. Associations of exposure to PM<sub>2.5</sub> and O<sub>3</sub> at the residential address during pregnancy with indicators of adiposity at age 4-6 years in children whose mothers did not smoke during pregnancy (n = 692).

| Exposure (increment)                                              | Overweight               | Waist circumference | Percent fat mass            | FMI                         |
|-------------------------------------------------------------------|--------------------------|---------------------|-----------------------------|-----------------------------|
|                                                                   | OR (95% CI)              | β (95% CI)          | β (95% CI)                  | β (95% CI)                  |
| Trimester 1 average PM <sub>2.5</sub> (1.3 μg/m <sup>3</sup> )    | 0.88 (0.63, 1.23)        | -0.15 (-0.56, 0.27) | -0.29 (-0.96, 0.38)         | -0.07 (-0.19, 0.06)         |
| Trimester 2 average PM <sub>2.5</sub> (1.3 μg/m <sup>3</sup> )    | 1.07 (0.78, 1.47)        | 0.35 (-0.06, 0.76)  | <b>0.73 (0.06, 1.39)</b>    | <b>0.13 (0.01, 0.26)</b>    |
| Trimester 3 average PM <sub>2.5</sub> (1.3 μg/m <sup>3</sup> )    | 1.11 (0.79, 1.56)        | -0.16 (-0.58, 0.27) | <b>-1.00 (-1.69, -0.32)</b> | <b>-0.15 (-0.28, -0.02)</b> |
| Full pregnancy average PM <sub>2.5</sub> (0.9 μg/m <sup>3</sup> ) | 1.18 (0.82, 1.71)        | 0.04 (-0.43, 0.51)  | -0.21 (-0.99, 0.58)         | -0.02 (-0.17, 0.12)         |
| Trimester 1 average 8-hr max O <sub>3</sub> (20.4 ppb)            | 0.87 (0.33, 2.32)        | -0.33 (-1.50, 0.85) | <b>-2.71 (-4.65, -0.77)</b> | <b>-0.39 (-0.75, -0.02)</b> |
| Trimester 2 average 8-hr max O <sub>3</sub> (18.0 ppb)            | 1.57 (0.68, 3.62)        | 0.20 (-0.82, 1.23)  | 0.10 (-1.56, 1.75)          | 0.04 (-0.26, 0.35)          |
| Trimester 3 average 8-hr max O <sub>3</sub> (18.7 ppb)            | 1.54 (0.65, 3.64)        | -0.62 (-1.72, 0.48) | <b>2.18 (0.40, 3.96)</b>    | 0.32 (-0.01, 0.66)          |
| Full pregnancy average 8-hr max O <sub>3</sub> (5.8 ppb)          | <b>1.85 (1.06, 3.22)</b> | -0.11 (-0.78, 0.56) | -0.30 (-1.41, 0.81)         | -0.02 (-0.23, 0.19)         |

Abbreviations: PM<sub>2.5</sub> = fine particulate matter; O<sub>3</sub> = ozone; FMI = fat mass index. Statistically significant results are highlighted in bold (p < 0.05). Associations are shown for an interquartile range increase in exposure. Associations are adjusted for child's sex, child's age, maternal age at delivery, pre-pregnancy BMI, parity, race/ethnicity, maternal level of education, season of birth and median income in the Census tract. Associations with PM<sub>2.5</sub> are additionally adjusted for the average 8-hour maximum O<sub>3</sub> concentration during the specified pregnancy period. Associations with O<sub>3</sub> are additionally adjusted for the average daily PM<sub>2.5</sub> concentration during the specified pregnancy period.

Table S9. Associations of exposure to traffic at the residential address during pregnancy with indicators of adiposity at age 4-6 years in children whose mothers did not smoke during pregnancy (n = 692).

| Exposure                                                      | Overweight               | Waist circumference | Percent fat mass    | FMI                      |
|---------------------------------------------------------------|--------------------------|---------------------|---------------------|--------------------------|
|                                                               | OR (95% CI)              | $\beta$ (95% CI)    | $\beta$ (95% CI)    | $\beta$ (95% CI)         |
| Distance to highway (m)                                       |                          |                     |                     |                          |
| Quartile 1 (<404.24)                                          | <b>2.25 (1.09, 4.65)</b> | 0.88 (-0.01, 1.77)  | 0.86 (-0.61, 2.32)  | <b>0.29 (0.02, 0.57)</b> |
| Quartile 2 (404.24 - 866.43)                                  | 1.25 (0.58, 2.72)        | 0.71 (-0.16, 1.59)  | 0.73 (-0.71, 2.18)  | 0.23 (-0.04, 0.50)       |
| Quartile 3 (866.43 - 1688.56)                                 | <b>2.15 (1.07, 4.32)</b> | 0.76 (-0.07, 1.60)  | 0.58 (-0.82, 1.98)  | 0.20 (-0.06, 0.46)       |
| Quartile 4 ( $\geq$ 1688.56)                                  | ref                      | ref                 | ref                 | ref                      |
| Distance to other major roadway (m)                           |                          |                     |                     |                          |
| Quartile 1 (<68.01)                                           | 0.84 (0.43, 1.64)        | 0.08 (-0.79, 0.95)  | 0.04 (-1.39, 1.47)  | 0.00 (-0.27, 0.27)       |
| Quartile 2 (68.01 - 152.89)                                   | 0.90 (0.47, 1.73)        | -0.03 (-0.88, 0.82) | 0.64 (-0.76, 2.04)  | 0.08 (-0.18, 0.35)       |
| Quartile 3 (152.89 - 307.58)                                  | 0.87 (0.45, 1.69)        | -0.01 (-0.87, 0.86) | 0.55 (-0.89, 1.98)  | 0.08 (-0.18, 0.35)       |
| Quartile 4 ( $\geq$ 307.58)                                   | ref                      | ref                 | ref                 | ref                      |
| Traffic density within 150m<br>(vehicles*km/day) <sup>a</sup> |                          |                     |                     |                          |
| Quartiles 1 and 2 combined (0.00 - 437.04)                    | ref                      | ref                 | ref                 | ref                      |
| Quartile 3 (437.04 - 2846.08)                                 | 0.93 (0.53, 1.65)        | 0.22 (-0.52, 0.96)  | 0.25 (-0.96, 1.46)  | 0.03 (-0.19, 0.26)       |
| Quartile 4 ( $\geq$ 2846.08)                                  | 1.02 (0.57, 1.83)        | -0.21 (-0.96, 0.55) | -0.02 (-1.27, 1.23) | -0.03 (-0.27, 0.20)      |
| Traffic density within 250m<br>(vehicles*km/day)              |                          |                     |                     |                          |
| Quartile 1 (0.00)                                             | ref                      | ref                 | ref                 | ref                      |
| Quartile 2 (0.00 - 3276.04)                                   | 0.99 (0.52, 1.87)        | 0.57 (-0.30, 1.43)  | -0.11 (-1.53, 1.31) | 0.01 (-0.26, 0.28)       |
| Quartile 3 (3276.04 - 9493.52)                                | 0.51 (0.25, 1.04)        | -0.19 (-1.04, 0.65) | -1.02 (-2.42, 0.38) | -0.23 (-0.49, 0.04)      |
| Quartile 4 ( $\geq$ 9493.52)                                  | 1.10 (0.58, 2.06)        | -0.02 (-0.88, 0.84) | 0.07 (-1.33, 1.48)  | 0.01 (-0.25, 0.28)       |
| Traffic density within 500m<br>(vehicles*km/day)              |                          |                     |                     |                          |
| Quartile 1 (<9478.13)                                         | ref                      | ref                 | ref                 | ref                      |
| Quartile 2 (9478.13 - 23058.84)                               | 0.56 (0.29, 1.10)        | -0.01 (-0.86, 0.84) | 0.06 (-1.34, 1.46)  | -0.01 (-0.27, 0.26)      |
| Quartile 3 (23058.84 - 42550.53)                              | 0.56 (0.28, 1.12)        | -0.43 (-1.30, 0.45) | 0.20 (-1.25, 1.65)  | 0.00 (-0.27, 0.27)       |
| Quartile 4 ( $\geq$ 42550.53)                                 | 1.02 (0.54, 1.94)        | 0.30 (-0.59, 1.19)  | 0.77 (-0.68, 2.22)  | 0.17 (-0.10, 0.45)       |

| Traffic density within 1000m<br>(vehicles*km/day) |                   |                    |                          |                          |
|---------------------------------------------------|-------------------|--------------------|--------------------------|--------------------------|
| Quartile 1 (<64368.33)                            | ref               | ref                | ref                      | ref                      |
| Quartile 2 (64368.33 - 111625.29)                 | 1.00 (0.49, 2.04) | 0.20 (-0.68, 1.08) | 1.29 (-0.17, 2.74)       | 0.23 (-0.05, 0.50)       |
| Quartile 3 (111625.29 - 160574.81)                | 1.53 (0.78, 3.02) | 0.51 (-0.40, 1.42) | <b>1.58 (0.08, 3.08)</b> | <b>0.32 (0.04, 0.61)</b> |
| Quartile 4 (≥160574.81)                           | 1.06 (0.52, 2.18) | 0.41 (-0.50, 1.33) | 0.69 (-0.82, 2.20)       | 0.21 (-0.07, 0.50)       |

Abbreviations: FMI = fat mass index. Statistically significant results are highlighted in bold (p <0.05).

Associations are adjusted for child's sex, child's age, maternal age at delivery, pre-pregnancy BMI, parity, race/ethnicity, maternal level of education, season of birth and median income in the Census tract.

<sup>a</sup> For traffic density in a buffer of 150m around the home address, quartiles 1 and 2 were combined due to the large number of zero values.

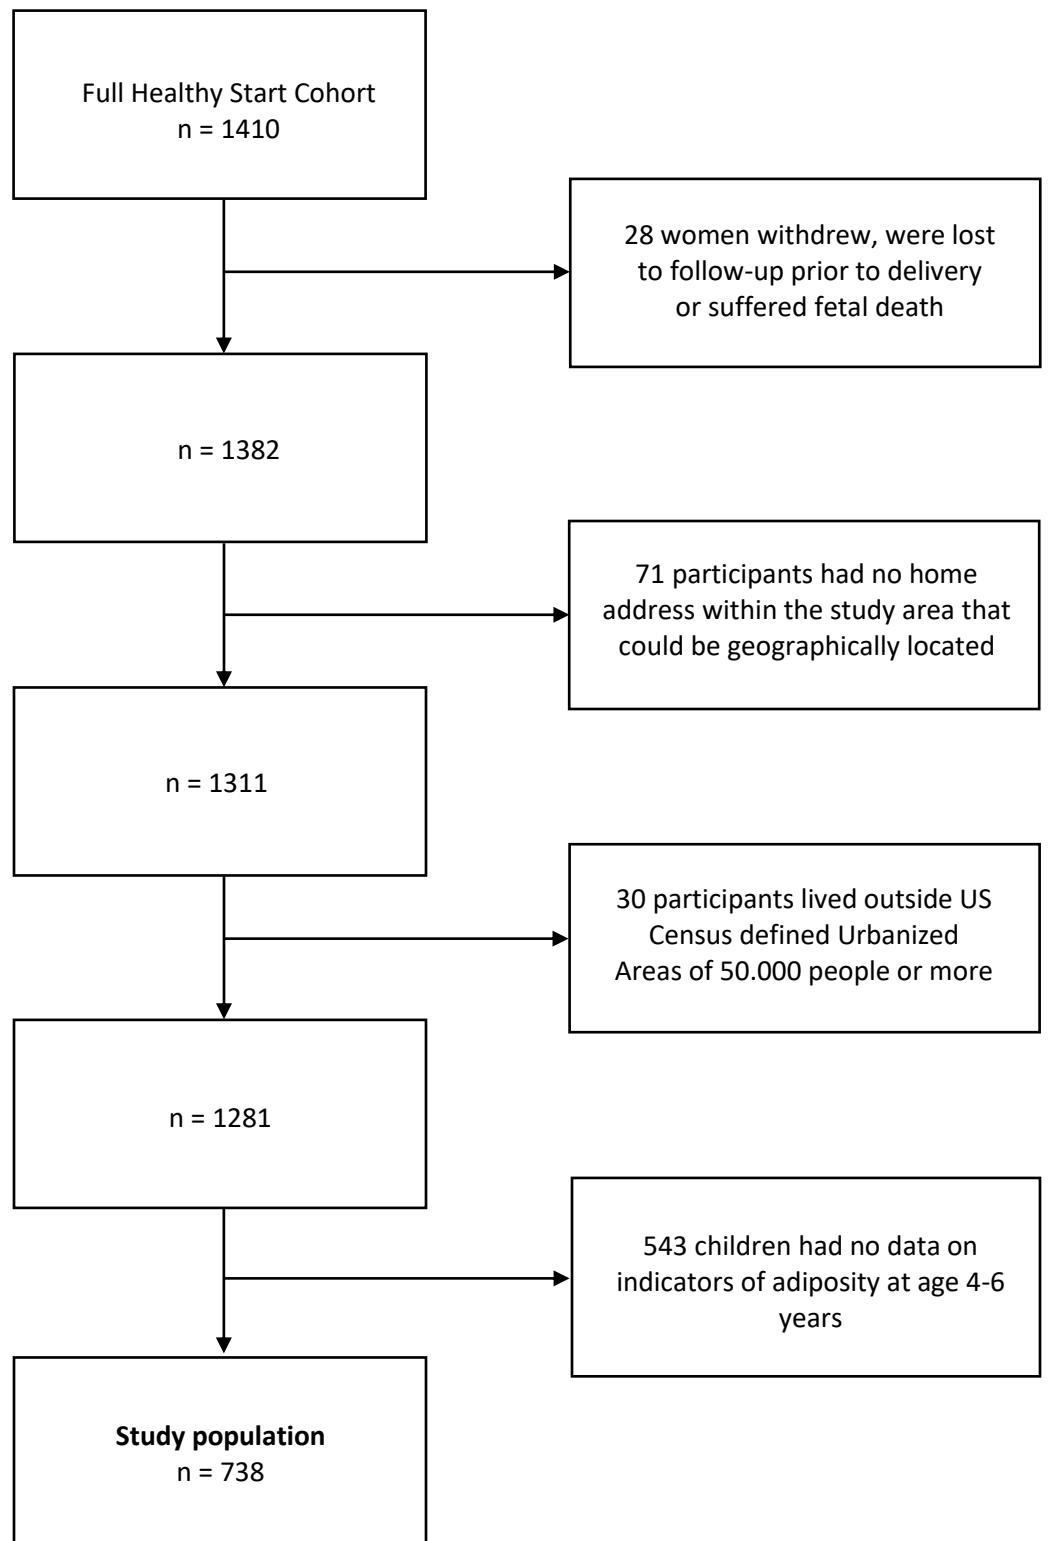

Figure S1. Flow diagram of study participants.

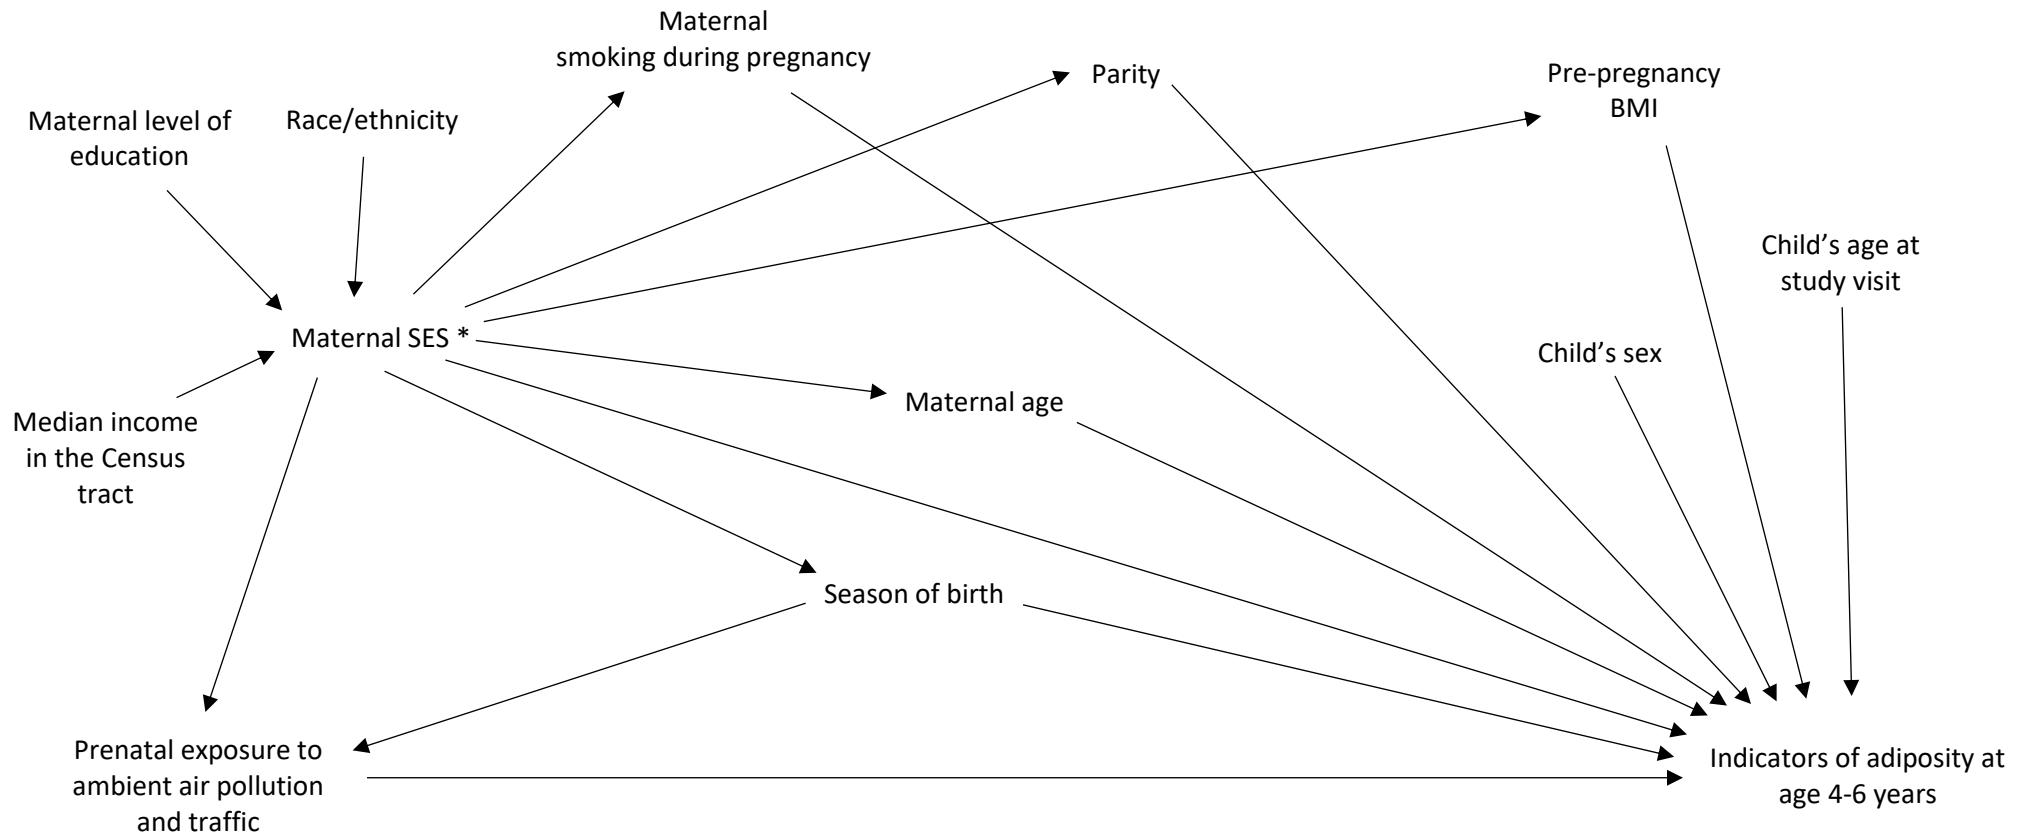

Figure S2. Directed acyclic graph for the associations of exposure to ambient air pollution and traffic at the residential address during pregnancy with indicators of adiposity at age 4-6 years. Abbreviations: SES = socioeconomic status; BMI = body mass index.

\* Unmeasured

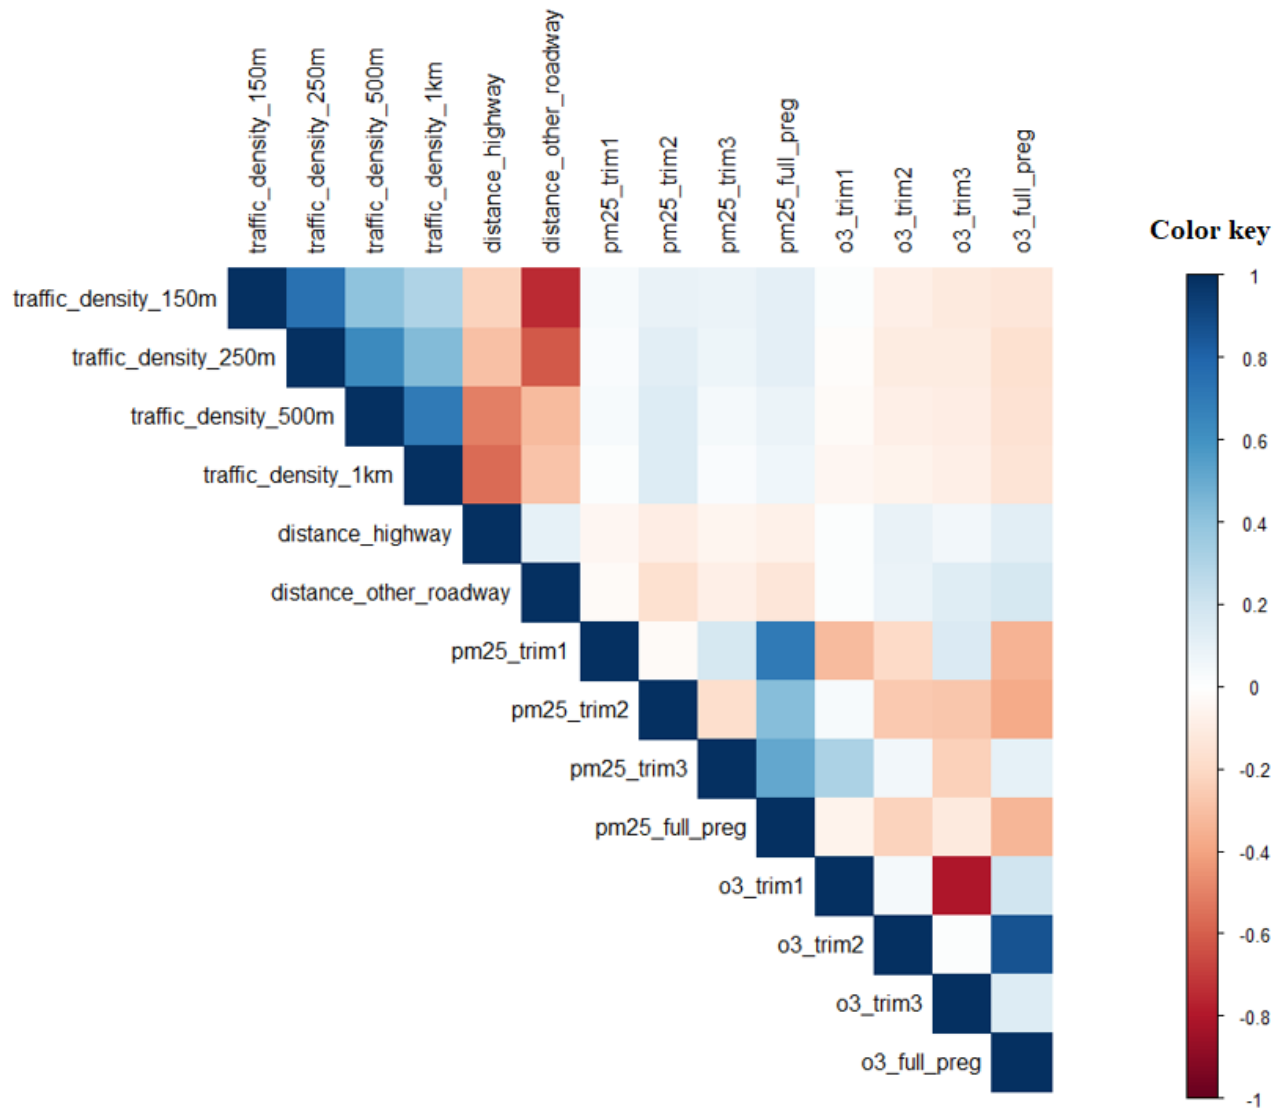

Figure S3. Spearman correlations between prenatal exposure to traffic and ambient air pollution among 738 participants of the Healthy Start study. Blue squares represent positive correlations; orange and red squares represent negative correlations. Abbreviations: PM<sub>2.5</sub> = fine particulate matter; O<sub>3</sub> = ozone.
